# Supplementary material for: A Whole-Body Model for Glycogen Regulation Reveals a Critical Role for Substrate Cycling in Maintaining Blood Glucose Homeostasis
Source: PLoS Comput Biol. 2011 Dec 1;7(12):e1002272. doi: 10.1371/journal.pcbi.1002272 (PMC3233304; doi:10.1371/journal.pcbi.1002272)
Supplement: Protocol S1 — Detailed model equations and supplemental figures. (DOC) [file pcbi.1002272.s001.doc]

# Supplementary Material – Model details

for

**A Whole-body Model for Glycogen Regulation Reveals A Critical Role for Substrate Cycling in Maintaining Blood Glucose**

Ke Xu1,2, Kevin Morgan3, Abby Todd Gehris4, Timothy C Elston2,*, Shawn M Gomez1,2,5,*

Addresses:

1 Department of Biomedical Engineering, University of North Carolina School of

Medicine, Chapel Hill, North Carolina 27599, USA

2 Department of Pharmacology, University of North Carolina School of Medicine, Chapel Hill, North Carolina 27599, USA

3 Old Dogs in Training LLC, Carrboro, North Carolina 27510, USA

4 Department of Mathematics, Broome Community College, Binghamton, New York

13902, USA

5 Department of Computer Science, University of North Carolina at Chapel Hill, Chapel

Hill, North Carolina, USA

∗ E-mail: telston@amath.unc.edu, smgomez@unc.edu

**Part I: Model Equations ([1])**

**1. Rates and Equations for the Whole-body Physiological Model**

**LIVER RATES:**

**BLOOD RATES (Transport and Decay):**

**FAT RATES:**

**MUSCLE RATES:**

**HORMONAL GROWTH RATES:**

**MODEL EQUATIONS:**

**2 Rates and Equations for Glycogen Regulatory Circuit Model**

**GLYCOGEN REGULATORY CIRCUIT:**

**Part II : Tables**

**1. Parameter Values ([1])**

Note that where literature was available, parameters were selected to meet published criteria (Table S.1-S.7). Where it was not, the parameters were chosen to be within a physiologically relevant range and at the same time minimize the discrepancy from the experiments by Hue et al.

**Table S1 Parameter Values for Liver Reactions**

| *Reaction* | *Parameters* |  | *Reaction* | *Parameters* |
| --- | --- | --- | --- | --- |
| *vL*1 | *kL*1 = 3 mM*min-1  *kmL*1 = 7.7 mM [2]  *ep*1 = 10 |  | *vL*6 | *kL*6 = 1 mM*min-1  *kmL*6 = 0.22 mM[3]  *p*2 = 1  *kp*2 = 2 mM  *ep*4 = 10 |
| *v-L*1 | *k-L*1 = 4 mM*min-1  *km-L*1 = 1.3 mM[4]  *ep*9 = 10 |  | *vL*7 | *kL*7 = 1 mM*min-1  *kmL*7 = 0.0204 mM [5]  *ki*8 = 2 mM |
| *vL*2 | *kL*2 = 200 min-1  *kmL*2 = .57 mM[6] |  | *vL*8 | *kL*8 = 0.1 mM-1*min-1  *ki*4 = 3 mM |
| *v-L*2 | *k*-*L*2 = 20 min-1  *km*-*L*2 = 1.4 mM[7] |  | *vL*9 | *kL*9 = 0.1 min-1 |
| *vL*3 | *kL*3 = 0.1 mM*min-1  *kmL*3 = .01 mM[8]  *ep*2 = 10  en1 = 10 |  | *vL*10 | *kL*10 = 0.1 min-1 |
| *v*-*L*3 | *k*-*L*3 = .1 mM*min-1  *km*-*L*3 = 0.0034 mM [9]  *ep*8 = 10  *en*6 = 10 |  | *vL*11 | *kL*11 = 0.6 min-1  *ep*5 = 10 |
| *vL*4 | *kL*4 = 2 mM*min-1,  *kmL*4 = 0.18 mM [10]  *ki*13 = 2 mM,  *ep*3 = 10,  *en*2 = 10 |  | *v-L*11 | *k*-*L*11 = 0.01 min-1 |
| *vL*5 | *kL*5 = 0  *kmL*5 = .03mM [11] |  | *vL*12 | *kL*12 = 0.6 min-1  *ep*6 = 10  *en*4 = 10 |
| *v*-*L*5 | *k*-*L*5 = 0.1 mM*min-1  *km*-*L*5 = 0.8 mM[12] |  | *vL*13 | *kL*13 = 0.5 min-1  *ep*7 = 10  *en*5 = 10 |
| *vL*14 | *kL*14 = 0.01 min-1  *ep*10 = 10  *en*7 = 10 |  | *vL*19 | *kL*19 = 0.01 mM-1*min-1  *ep*11 = 10  *en*8 = 10 |
| *vL*15 | *kL*15 = 0.01 min-1  *p*1 = 1  *kp*1 = 0.5 mM  *ki*5 = 1 mM |  | *vL*20 | *kL*20 = 0.2 min-1 |
| *vL*16 | *kL*16 = 0.01 mM-7*min-1 |  | *vL*21 | *kL*21 = 0.001 mM*min-1  *en*3 = 10  *kmL*21p = 0.4 mM [13, 14]  *kmL*21g = 4.3 mM[123 15] |
| *vL*17 | *kL*17 = 0.01 mM*min-1  *ki*1 = 0.1 mM |  | *v*-*L*21 | *k*-*L*21 = 0.2 min-1  *en*3 = 10  *km-L*21a = 21 mM[16]  *km-L*21k = 0.22 mM[16] |
| *vL*18 | *kL*18 = 0.01 min-1  *ki*2 = 1 mM |  | *vL*22 | *kL*22 = 0.01 min-1 |

**Table S2 Parameter Values for Blood Reactions (Transport, Decay and Feed)**

| *Reaction* | *Parameters* |  | *Reaction* | *Parameters* |
| --- | --- | --- | --- | --- |
|  |  |  |  |  |
| *vtL*1 | *ktL*1 = 100 min-1 |  | *vtF*1 | *ktF*1 = 0.01 min-1  *ep*12 = 10 |
| *vtL*2 | *ktL*2 = 0.1 min-1 |  | *vtF*3 | *ktF*3 = 0.01 mM-7*min-1  *en*9 = 20 |
| *vtL*3 | *ktL*3 = 0.1 min-1 |  | *vtS*1 | *ktS*1 = 0.01 min-1  *ep*13 = 10 |
| *vtL*4 | *ktL*4 = 0.1 min-1 |  | *vtS*2 | *ktS*2 = 1 min-1 |
| *vtL*5 | *ktL*5 = 0.1 min-1 |  | *vtS*3 | *ktS*3 = 0.01 min-1 |
| *vtL6* | *ktL*6 = 1 min-1  *en*10 = 10 |  | *vtS*4 | *ktS*4 = 3 min-1  *en*11 = 10 |
|  |  |  |  |  |
| *vd_Bgluc* | *kd_Bgluc* = 0.015 min-1 |  | *vd_Blac* | *kd_Blac* = 0.01 min-1 |
| *vd_Bins* | *kd_Bins* = 0.015 min-1 |  | *vd_Bket* | *kd_Bket* = 0.01 min-1 |
| *vd_Bglucgn* | *kd_Bglucgn* = 0.015 min-1 |  | *vd_Balan* | *kd_Balan* = 0.01 min-1 |
| *vd_Bffa* | *kd_Bffa* = 0.015 min-1 |  | *vfeed* | *kfeed* = 0.5 mM*min-1 |

**Table S3 Parameter Values for Fat Reactions**

| *Reaction* | *Parameters* |  | *Reaction* | *Parameters* |
| --- | --- | --- | --- | --- |
|  |  |  |  |  |
| *vF*1 | *kF*1 = 0.1 min-1  *ep*14 = 10 |  | *vF*4 | *kF*4 = 0.1 min-1  *en*12 = 10 |
| *vF*3 | *kF*3 = 0.2 min-1  *ep*15 = 10 |  | *vF*5 | *kF*5 = 0.1 mM-2*min-1 |

**Table S4 Parameter Values for Muscle Reactions**

| *Reaction* | *Parameters* |  | *Reaction* | *Parameters* |
| --- | --- | --- | --- | --- |
|  |  |  |  |  |
| *vS*1 | *kS*1 = 0 |  | *vS*4 | *kS*4 = 0.07 min-1 |
| *v*-*S*1 | *k*-*S*1 = 0 |  | *v*-*S*4 | *k*-*S*4 = 0 |
| *vS*2 | *kS*2 = 0.02 min-1 |  | *vS*5 | *kS*5 = 0.5 min-1 |
| *vS*3 | *kS*3 = 0.01 min-1 |  | *vS_dket* | *kS_dket* = 0.01 min-1 |
| *v*-*S*3 | *k*-*S*3 = 0.01 min-1 |  |  |  |

**Table S5 Parameter Values for Glycogen Regulatory Circuit Reactions**

| *Reaction* | *Parameters* |  | *Reaction* | *Parameters* |
| --- | --- | --- | --- | --- |
| *vg*3 | *kg*3 = 1200 min-1 [17]  *kmg*3 = 0.0004 mM [17] |  | *vg*6 | *kg*6 = 300 min-1 [17, 18]  *kmg*6 = 0.005 mM [17, 19]  *s*2 = .001 [17]  *kgi* = 10 mM [17] |
| *vg*4 | *kg*4 = 300 min-1 [17]  *kmg*4 = 0.0011 mM [17, 20] |  | *vg*7 | *kg*7 = 1200 min-1 [17]  *kmg*7 = 0.015 mM[17] |
| *vg*5 | *kg*5 = 1200 min-1[17, 21]  *kmg*5 = 0.01 mM[17, 22] |  | *vg*8 | *kg*8 = 300 min-1  *kmg*8 = 0.00012 mM [17, 23] |
| *vg*5, *vg*7, *vg*8 | *s*1 = 100 [17]  *kg*2 = 0.5 mM [17] |  |  |  |

**Table S6 Additional Parameter Values for Glycogen Regulatory Circuit in Isolation ([17, 24-26])**

| *Parameters* |  | *Parameters* |  | *Parameters* |
| --- | --- | --- | --- | --- |
| *capkt* = 0.00025 mM |  | *PP2A* = 0.000025 mM |  | *g6pt* = 0.7 mM |
| *It* = 0.0018 mM |  | *k11* = 0.000043 mM |  | *kgi* = 10 mM |
| *kt* = 0.0025 mM |  | *k22* = 0.0007 mM |  | *s1* = 100 |
| *pt* = 0.07 mM |  | *ki* = 0.1 mM |  | *kg2* = 0.5 mM |
| *st* = 0.003 mM |  | *campt* = 0.01 mM |  | *s2* = 0.001 |
| *PP1* = 0.00025 mM |  | *kg* = 349.5 mM |  |  |

**Table S7 Parameter Values Pertaining to Non-Metabolite Regulators (Insulin, Glucagon and cAMP)**

| *Reaction* | *Parameters* |  | *Reaction* | *Parameters* |
| --- | --- | --- | --- | --- |
| *vL*1, *vL*3, *vL*4, *vL*12, *vL*13, *vL*14, *vL*19, *vL*21, *v-L*21, *vtL*6, *vtF*1, *vtS*1, *vtS*4, *vF*1, *vF*3, *vF*4 | *kDins* = 1 * 10-6 mM |  | *vglucgn* | *kglucgn* = 2 * 10-9 mM*min-1 |
| *v-L*3, *vL*20, *vtF*3 | *kDins2* = 0.75 * 10-6 mM |  | *vc*1 | *kc*1 = 1 mM*min-1  *kcm*1 = 4 * 10-8 mM |
| *v-L*1, *vL*3, *v-L*3, *vL*4, *vL*6, *vL*11, *vL*12, *vL*13, *vL*14 | *kDglucgn* = 4 * 10-8 mM |  | *vc*2 | *kc*2 = 1 * 10-5.5 mM*min-1  *kcm*2 = 1 * 10-6 mM |
| *vL*19 | *kDcAMP* = 1 * 10-5.5 mM |  | *vgc*1 | *kgc*1 = 6 * 1010 mM-2 min-1  *k-gc*1 = 1.3953 * 1015 mM-1 min-1 |
| *vins* | *kins* = 7 * 10-4 mM*min-1 |  | *vgc*2 | *kgc*2 = 6 * 1010 mM-2 min-1  *k-gc*2 = 8.5714 * 1013 mM-1 min-1 |
| *vIgluc* | *k*1*ins* = 6 * 10-4 mM*min-1  *kmins* = 8 mM  *ni* = 10 |  | *vIgluc*, *vc*1 | *ni* = 10 |
| *vGgluc* | *k*1*glucgn* = 5 * 10-9 mM*min-1  *kmGlgn* = 8 mM  *ng* = 10 |  | *vGgluc*, *vc*2 | *ng* = 10 |

**2. Parameter Sensitivity**

Sensitivity analysis is carried out for each reaction parameters, as listed before. These parameters are varied by 10 fold (up and down) to the baseline values. The sensitivity constant C is defined as the fold change in blood glucose concentration to the fold change of parameter when system reaches the fed steady state with a constant glucose input. For example, *kL*1 can be varied between [0.3, 10.17], causing a change in blood glucose from 8.48 mM to 7.10 mM.

**Table S8 Blood Glucose Sensitivity Due To 10-fold Changes In Parameter Values In Liver**

| *Reaction* | *Parameters*  *(Baseline values)* |  |  |
| --- | --- | --- | --- |
| *vL*1 | *kL*1 = 3  *kmL*1 = 7.7 [2] | 5.93 e-03  1.83 e-03 | 5.06 e-02  2.63 e-02 |
| *v-L*1 | *k-L*1 = 4  *km-L*1 = 1.3 [4] | 5.19 e-03  2.17 e-03 | 4.83 e-02  3.59 e-02 |
| *vL*2 | *kL*2 = 200  *kmL*2 = .57 [6] | 8.58 e-04  4.16e-04 | 1.77 e-02  8.76 e-03 |
| *v-L*2 | *k*-*L*2 = 20  *km*-*L*2 = 1.4 [7] | 1.10 e-04  8.55e-08 | 2.36 e-03  1.84e-06 |
| *vL*3 | *kL*3 = 0.1  *kmL*3 = .01 [8] | 5.07 e-04  7.74e-06 | 3.20 e-03  1.66 e-04 |
| *v*-*L*3 | *k*-*L*3 = .1  *km*-*L*3 = 0.0034 [9] | 6.97e-05  6.36e-06 | 1.49 e-03  1.37 e-04 |
| *vL*4 | *kL*4 = 2,  *kmL*4 = 0.18 [10]  *ki*13 = 2, | 3.51e-05  6.36e-06  8.46e-06 | 2.76 e-04  1.37 e-04  8.17e-05 |
| *vL*5 | *kL*5 = 0  *kmL*5 = .03 [11] | Reaction set to 0 | Reaction set to 0 |
| *v*-*L*5 | *k*-*L*5 = 0.1  *km*-*L*5 = 0.8 [12] | 9.28e-09  3.02e-13 | 1.69e-07  6.48e-12 |
| *vL*6 | *kL*6 = 1  *kmL*6 = 0.22 [3]  *p*2 = 1  *kp*2 = 2 | 3.97e-06  3.35e-06  1.10e-06  3.61e-07 | 5.54e-05  5.29e-05  2.36e-05  7.76e-06 |
| *vL*7 | *kL*7 = 1  *kmL*7 = 0.0204 [5]  *ki*8 = 2 | 9.06e-06  3.35e-06  4.06e-06 | 7.13e-05  5.29e-05  4.35e-05 |
| *vL*8 | *kL*8 = 0.1  *ki*4 = 3 | 1.02e-06  4.02e-07 | 2.20e-05  8.65e-06 |
| *vL*9 | *kL*9 = 0.1 | 1.51e-07 | 3.25e-06 |
| *vL*10 | *kL*10 = 0.1 | 4.02e-07 | 8.64e-06 |
| *vL*11 | *kL*11 = 0.6 | 1.02e-06 | 2.20e-05 |
| *v-L*11 | *k*-*L*11 = 0.01 | 5.17e-08 | 1.11e-06 |
| *vL*12 | *kL*12 = 0.6 | 5.17e-08 | 1.11e-06 |
| *vL*13 | *kL*13 = 0.5 | 4.42e-13 | 9.49e-12 |
| *vL*14 | *kL*14 = 0.01 | 1.48e-07 | 3.19e-06 |
| *vL*15 | *kL*15 = 0.01  *p*1 = 1  *kp*1 = 0.5  *ki*5 = 1 | 2.70e-08  7.43e-09  3.16e-09  1.53e-08 | 5.79e-07  1.60e-07  6.80e-08  3.29e-07 |
| *vL*16 | *kL*16 = 0.01 | 2.70e-08 | 5.79e-07 |
| *vL*17 | *kL*17 = 0.01  *ki*1 = 0.1 | 1.062e-08  7.20e-09 | 2.28e-07  1.55e-07 |
| *vL*18 | *kL*18 = 0.01  *ki*2 = 1 | 3.92e-07  2.18e-07 | 8.43e-06  4.68e-06 |
| *vL*19 | *kL*19 = 0.01 | 4.675e-07 | 1.01e-05 |
| *vL*20 | *kL*20 = 0.2 | 6.63e-06 | 6.86e-05 |
| *vL*21 | *kL*21 = 0.001  *kmL*21p = 0.4 [13, 14]  *kmL*21g = 4.3 [123 15] | 3.33e-10  2.74e-10  1.13e-10 | 7.17e-09  5.89e-09  2.44e-09 |
| *v*-*L*21 | *k*-*L*21 = 0.2  *km-L*21a = 21 [16]  *km-L*21k = 0.22 [16] | 4.45e-07  4.01e-07  4.02e-07 | 9.57e-06  8.61e-06  8.64e-06 |
| *vL*22 | *kL*22 = 0.01 | 1.13e-10 | 2.445e-09 |

**Table S9 Blood Glucose Sensitivity Due To 10-fold Changes In Parameter Values** In Fat

| *Reaction* | *Parameters*  *(Baseline values)* |  |  |
| --- | --- | --- | --- |
| *VF*1 | *kF*1 = 0.1 min-1 | 2.33e-13 | 5.01e-12 |
| *VF*3 | *kF*3 = 0.2 min-1 | 2.32e-13 | 4.99e-12 |
| *VF4* | *kF*4 = 0.1 min-1 | 2.32e-13 | 4.994e-12 |
| *VF5* | *kF*5 = 0.1 mM-2*min-1 | 2.43e-13 | 5.23e-12 |

**Table S10 Blood Glucose Sensitivity Due To 10-fold Changes In Parameter Values In Muscle**

| *Reaction* | *Parameters*  *(Baseline values)* |  |  |
| --- | --- | --- | --- |
| *vS*2 | *kS*2 = 0.02 min-1 | 4.00e-13 | 8.59e-12 |
| *vS*3 | *kS*3 = 0.01 min-1 | 5.44e-07 | 1.17e-05 |
| *v*-*S*3 | *kF*4 = 0.1 min-1 | 1.55e-07 | 3.34e-06 |
| *vS*4 | *kS*4 = 0.07 min-1 | 5.44e-07 | 1.169e-05 |
| *vS_dket* | *kS_dket* = 0.01 min-1 | 2.35e-13 | 5.06e-12 |

**Part III: Figures**

**S1. Reactions Included in Liver Component of the Model ([1])**

**Figure S1. Reactions Included in Liver Component of the Model.** The corresponding rate of each reaction is described in the text.

**S2. Reactions Included in Liver Component of the Model ([1])**

**Figure S2. Reactions Included in the Fat Component of the Model.** The corresponding rate of each reaction is described in the text.

**S3. Reactions Included in Muscle Component of the Model ([1])**

**Figure S3. Reactions Included in the Muscle Component of the Model.** The corresponding rate of each reaction is described in the text.

**S4. Reactions Included in Muscle Component of the Model ([1])**

**Figure S4. Reactions for Transport Across the Cell Membranes.** The corresponding rate of each reaction is described in the text.

**S5. Glucose feeding function**


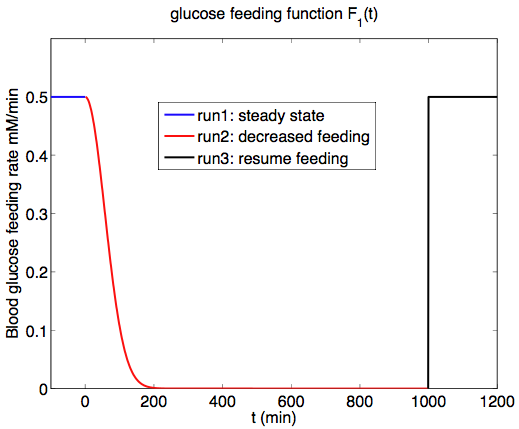


**Figure S5. Glucose feeding function in the blood.** The first run is for the system to reach fed steady state with a constant feeding rate in the blood; the second run is the post-adsorption state with a decreasing glucose feeding rate from the fed steady state (drops below 5% in 140 mins.) The third run is for a glucose stimulus to enter the system as a step function.

**S6. Glycogen concentration in fed and fasted livers.**


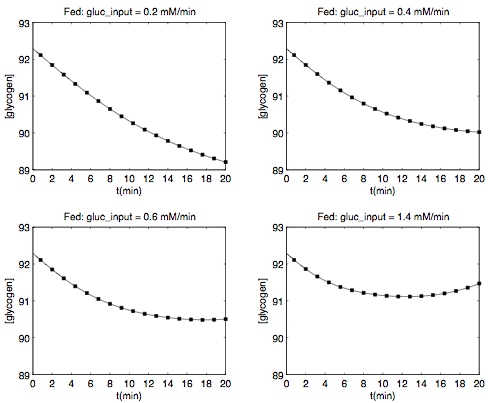

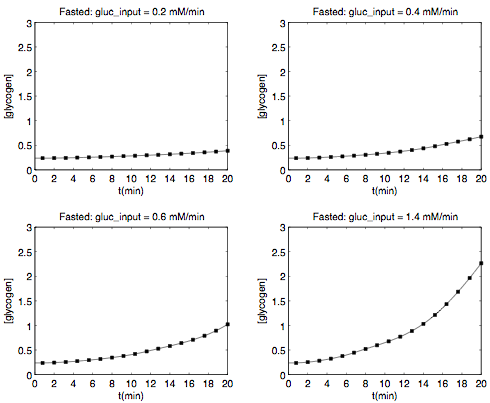


(a) Glycogen concentration in fed livers after a glucose stimulus enters blood stream at t=0.

(b) Glycogen concentration in fasted livers after a glucose stimulus enters blood stream at t=0.

**Figure S6. Glycogen concentrations in fed and fasted livers.**

**Part IV: Major Enzymes/Signaling Proteins**

**Table S11. The enzyme/protein names, abbreviations and the reactions are based on KEGG pathway.**

| **ENZYME** (Enzyme Commission number and name)  REACTION |
| --- |
| **HK** (EC 2.7.1.1 hexokinase)  **GLK** (EC 2.7.1.2 glucokinase)  ATP + glucose = ADP + glucose 6-phosphate |
| **PK** (EC 2.7.1.40 pyruvate kinase)  ADP + phosphoenolpyruvate = ATP + pyruvate |
| **LDH** (EC 1.1.1.27 lactate dehydrogenase)  pyruvate + NADH + H+ = lactate + NAD+ |
| **PDH** (EC 1.2.1.51 pyruvate dehydrogenase)  pyruvate + CoA + NAD+ = acetyl-CoA + CO2 + NADH |
| **PC**  (EC 6.4.1.1 pyruvate carboxylase)  ATP + oxaloacetate = ADP + phosphoenolpyruvate + CO2 |
| **CS** (EC 2.3.3.8 citrate synthase)  ADP + phosphate + acetyl-CoA + oxaloacetate = ATP + citrate + CoA |
| **MDH** (EC 1.1.1.37 malate dehydrogenase)  malate + NAD+ = oxaloacetate + NADH + H+ |
| **MS** (malate shuttle)  transports malate across mitochondrial membrane |
| **ALT** (EC 2.6.1.2 alanine transaminase)  alanine + α-ketoglutarate = pyruvate + glutamate |
| **AGT** (EC 2.6.1.44 L-alanine-glycine transaminase)  L-alanine + glyoxylate = pyruvate + glycine |
| **PEPCK** (EC 4.1.1.49 PEP carboxykinase)  ATP + oxaloacetate = ADP + phosphoenolpyruvate + CO2 |
| **G6Pase** (EC 3.1.3.9 glucose-6-phosphatase)  glucose 6-phosphate + H2O = glucose + phosphate |
| **GS** (EC 2.4.1.11 glycogen synthase)  UDP-glucose + (1,4-glucosyl)n = UDP + (1,4-glucosyl)(n+1) |
| **GP** (EC 2.4.1.1 glycogen phosphorylase)  ATP + glucose = ADP + glucose 6-phosphate |
| **CL** (EC 2.3.3.8 ATP citrate lyase)  ATP + citrate + CoA = ADP + phosphate + acetyl-CoA + oxaloacetate |
| **AC**  (EC 6.4.1.2 acetyl-CoA carboxylase)  ATP + acetyl-CoA + HCO3- = ADP + phosphate + malonyl-CoA |
| **FASN** (EC 2.3.1.85 Fatty Acid Synthase)  acetyl-CoA + n malonyl-CoA + 2n NADPH + 2n H+ = a long-chain fatty acid + (n+1) CoA + n CO2 + 2n NADP+ |
| **ACS** (EC 6.2.1.3 acyl-CoA synthetase)  ATP + a long-chain carboxylic acid + CoA = AMP + diphosphate + an acyl-CoA |
| **CPT1** (EC:[2.3.1.21](http://www.genome.jp/dbget-bin/www_bget?ec:2.3.1.21) carnitine O-palmitoyltransferase 1)  palmitoyl-CoA + L-carnitine = CoA + L-palmitoylcarnitine |
| **HMGS** (EC 2.3.3.10 HMG-CoA synthase)  acetyl-CoA + H2O + acetoacetyl-CoA = 3-hydroxy-3-methylglutaryl-CoA + CoA |
| **DGAT** (EC 2.3.1.20 diacylglycerol O-acyltransferase)  acyl-CoA + 1,2-diacyl-sn-glycerol = CoA + triacylglycerol |
| **LPL** (EC 3.1.1.34  lipoprotein lipase)  triacylglycerol + H2O = diacylglycerol + a carboxylate |
| **PP-1** (EC 3.1.3.16 protein phosphatase-1)  a phosphoprotein + H2O = a protein + phosphate |
| **GSP** (EC 3.1.3.42 [glycogen-synthase-D] phosphatase)  [glycogen-synthase D] + H2O = [glycogen-synthase I] + phosphate |
| **CAPK** cAMP dependent protein kinase |
| **PK** (phosphorylase kinase) |
| **INS** (Insulin) |
| **GCG** (Glucagon) |
| **cAMP** (Cyclic adenosine monophosphate) |

References:

1. Todd, A.J., *Inclusion of a glycogen regulation mathematical model into a contextual metabolic framework.* Ph.D. Thesis, 2008, University of North Carolina at Chapel Hill.

2. Tu, J. and B.E. Tuch, *Glucose regulates the maximal velocities of glucokinase and glucose utilization in the immature fetal rat pancreatic islet.* Diabetes, 1996. **45**(8): p. 1068-75.

3. Jitrapakdee, S., M.E. Walker, and J.C. Wallace, *Functional expression, purification, and characterization of recombinant human pyruvate carboxylase.* Biochem Biophys Res Commun, 1999. **266**(2): p. 512-7.

4. Guionie, O., et al., *Identification and characterisation of a new human glucose-6-phosphatase isoform.* FEBS Lett, 2003. **551**(1-3): p. 159-64.

5. Jeng, J., et al., *Pyruvate dehydrogenase E1 alpha isoform in rat testis: cDNA cloning, characterization, and biochemical comparison of the recombinant testis and liver enzymes.* Comp Biochem Physiol B Biochem Mol Biol, 1998. **120**(1): p. 205-16.

6. Huang, K.P. and J.C. Robinson, *Purification and properties of the glucose-6-phosphate-dependent form of human placental glycogen synthase.* Arch Biochem Biophys, 1976. **175**(2): p. 583-9.

7. Medicus, R. and J. Mendicino, *Role of enzyme interactions in the regulation of glycolysis and gluconeogenesis. Purification and properties of the phospho- and dephospho-forms of glycogen phosphorylase from swine kidney.* Eur J Biochem, 1973. **40**(1): p. 63-75.

8. Nicolau, J., D.N. Souza, and G. Nunez-Burgos, *Regulation of phosphofructokinase-1 on submandibular salivary glands of rats after isoproterenol administration.* Arch Physiol Biochem, 2000. **108**(5): p. 437-43.

9. Adams, A., C. Redden, and S. Menahem, *Characterization of human fructose-1,6-bisphosphatase in control and deficient tissues.* J Inherit Metab Dis, 1990. **13**(6): p. 829-48.

10. Srivastava, L.K. and N.Z. Baquer, *Purification and properties of rat brain pyruvate kinase.* Arch Biochem Biophys, 1985. **236**(2): p. 703-13.

11. LeVan, K.M. and E. Goldberg, *Properties of human testis-specific lactate dehydrogenase expressed from Escherichia coli.* Biochem J, 1991. **273 ( Pt 3)**: p. 587-92.

12. Mendiola, P. and J. De Costa, *The effects of temperature and pH on the kinetic properties of heart muscle lactate dehydrogenase from anuran amphibians.* Comp Biochem Physiol B Biochem Mol Biol, 1991. **98**: p. 529-534.

13. Ruscak, M., J. Orlicky, and V. Zubor, *Isoelectric focusing of the alanine aminotransferase isoenzymes from the brain, liver and kidney.* Comp Biochem Physiol B, 1982. **71**(1): p. 141-4.

14. DeRosa, G. and R.W. Swick, *Metabolic implications of the distribution of the alanine aminotransferase isoenzymes.* J Biol Chem, 1975. **250**(20): p. 7961-7.

15. Ward, C.W. and P.J. Schofield, *Glycolysis in Haemonchus contortus larvae and rat liver.* Comp Biochem Physiol, 1967. **22**(1): p. 33-52.

16. Gubern, G., et al., *Subcellular distribution of alanine aminotransferase activity in human liver.* Biochem Soc Trans, 1990. **18**(6): p. 1287-8.

17. Mutalik, V.K. and K.V. Venkatesh, *Quantification of the glycogen cascade system: the ultrasensitive responses of liver glycogen synthase and muscle phosphorylase are due to distinctive regulatory designs.* Theor Biol Med Model, 2005. **2**: p. 19.

18. Ingebritsen, T.S. and P. Cohen, *Protein phosphatases: properties and role in cellular regulation.* Science, 1983. **221**(4608): p. 331-8.

19. Foulkes, J.G., et al., *A kinetic analysis of the effects of inhibitor-1 and inhibitor-2 on the activity of protein phosphatase-1.* Eur J Biochem, 1983. **132**(2): p. 309-13.

20. Nimmo, G.A. and P. Cohen, *The regulation of glycogen metabolism. Phosphorylation of inhibitor-1 from rabbit skeletal muscle, and its interaction with protein phosphatases-III and -II.* Eur J Biochem, 1978. **87**(2): p. 353-65.

21. Shacter, E., P.B. Chock, and E.R. Stadtman, *Energy consumption in a cyclic phosphorylation/dephosphorylation cascade.* J Biol Chem, 1984. **259**(19): p. 12260-4.

22. Meinke, M.H. and R.D. Edstrom, *Muscle glycogenolysis. Regulation of the cyclic interconversion of phosphorylase a and phosphorylase b.* J Biol Chem, 1991. **266**(4): p. 2259-66.

23. Killilea, S.D., et al., *Evidence for the coordinate control of activity of liver glycogen synthase and phosphorylase by a single protein phosphatase.* J Biol Chem, 1976. **251**(8): p. 2363-8.

24. Cohen, P., *Control of enzyme activity*. 2nd ed. 1983, London; New York: Chapman and Hall. 96 p.

25. Aiston, S., et al., *Glucose 6-phosphate causes translocation of phosphorylase in hepatocytes and inactivates the enzyme synergistically with glucose.* Biochem J, 2004. **377**(Pt 1): p. 195-204.

26. Beavo, J.A., P.J. Bechtel, and E.G. Krebs, *Activation of protein kinase by physiological concentrations of cyclic AMP.* Proc Natl Acad Sci U S A, 1974. **71**(9): p. 3580-3.
